# Supplementary material for: Outdoor Light Spending Time, Genetic Predisposition and Incident Parkinson's Disease： The mediating effect of lifestyle and vitamin D
Source: Research Square preprint supplement (doi:10.21203/rs.3.rs-5773642/v1), 2025-01-10
Supplement: Supplementary file 1 [file b5e3c1244169de86646c6aa9.docx]

# Supplementary Material

**Table S1.** Definition of Parkinson's disease in UK Biobank study

**Table S2.** Characteristics of PD-associated SNPs in the UK Biobank

**Table S3.** Association between PD-PRS and incident PD

**Table S4.** Stratified analysis for the association between time spent in outdoor light (summer) and incidence of Parkinson's disease

**Table S5.** Stratified analysis for the association between time spent in outdoor light (winter) and incidence of Parkinson’s disease

**Table S6.** Stratified analysis for the association between time spent in outdoor light (average) and incidence of Parkinson’s disease

**Table S7.** Sensitive analysis for the association between time spent in outdoor light and incidence of Parkinson's disease, additionally adjusted for physical activity, vitamin D, and sleep patterns

**Table S8.** Sensitive analysis for the association between time spent in outdoor light and incidence of Parkinson's disease

**Fig S1.** Flow of participants in current study

**Fig S2.** The Curve of Density Distribution and Weighted Polygenic Risk Score

**Fig S3.** Directed acyclic graph (DAG) explaining the association between the exposures, the outcome, and covariates included in the analyses.

**Fig S4.** Associations of time spent in outdoor light time in summer (A), in winter (B), and on average (C) with the risk of Parkinson’s disease.

This supplemental material has been provided by the authors to give readers additional information about their work.

| **Table S1. Definition of Parkinson's disease in UK Biobank study** | | | |
| --- | --- | --- | --- |
| **Diagnosis** | **Self-reported field** | **ICD 9** | **ICD 10** |
| **Parkinson's Disease** | 1262 | 332,3320,3321,3330 | G20, G21, G21.0, G21.1, G21.2, G21.3, G21.4, G21.8, G21.9, G22, G23.0, G23.1, G23.2, G23.3, G23.8, G23.9, G25.9, G26, G90.3 |
| Abbreviations: ICD, International Classification of Diseases. | | | |

| **Table S2. Characteristics of PD-associated SNPs in the UK Biobank** | | | | | |
| --- | --- | --- | --- | --- | --- |
| **SNP** | **Chr** | **EAF in 1000 Genomes** | **A1** | **A2** | **OR** |
| rs10797576 | 1 | 0.137 | T | C | 1.12 |
| rs10906923 | 10 | 0.306 | C | A | 0.93 |
| rs11060180 | 12 | 0.450 | G | A | 0.90 |
| rs11158026 | 14 | 0.307 | T | C | 0.91 |
| rs11343 | 16 | 0.454 | T | G | 1.07 |
| rs115185635 | 3 | 0.036 | C | G | 1.21 |
| rs11724635 | 4 | 0.437 | C | A | 0.90 |
| rs117896735 | 10 | 0.012 | A | G | 1.65 |
| rs12456492 | 18 | 0.332 | G | A | 1.10 |
| rs12497850 | 3 | 0.347 | G | T | 0.93 |
| rs12637471 | 3 | 0.219 | A | G | 0.85 |
| rs13294100 | 9 | 0.371 | T | G | 0.91 |
| rs14235 | 16 | 0.397 | A | G | 1.08 |
| rs143918452 | 3 | 0.996 | G | A | 0.68 |
| rs1474055 | 2 | 0.881 | C | T | 0.83 |
| rs1555399 | 14 | 0.544 | T | A | 1.09 |
| rs17649553 | 17 | 0.232 | T | C | 0.78 |
| rs199347 | 7 | 0.368 | G | A | 0.91 |
| rs2280104 | 8 | 0.367 | T | C | 1.06 |
| rs2414739 | 15 | 0.292 | G | A | 0.91 |
| rs2694528 | 5 | 0.115 | C | A | 1.15 |
| rs2740594 | 8 | 0.753 | A | G | 1.10 |
| rs329648 | 11 | 0.327 | T | C | 1.09 |
| rs34043159 | 2 | 0.352 | C | T | 1.07 |
| rs34311866 | 4 | 0.199 | C | T | 1.23 |
| rs353116 | 2 | 0.385 | T | C | 0.94 |
| rs356182 | 4 | 0.375 | G | A | 1.33 |
| rs35749011 | 1 | 0.976 | G | A | 0.58 |
| rs3793947 | 11 | 0.463 | A | G | 0.93 |
| rs4073221 | 3 | 0.132 | G | T | 1.11 |
| rs4653767 | 1 | 0.315 | C | T | 0.92 |
| rs4784227 | 16 | 0.265 | T | C | 1.08 |
| rs591323 | 8 | 0.293 | A | G | 0.91 |
| rs601999 | 17 | 0.699 | C | T | 0.93 |
| rs62120679 | 19 | 0.324 | T | C | 1.08 |
| rs6430538 | 2 | 0.488 | T | C | 0.89 |
| rs6812193 | 4 | 0.398 | T | C | 0.91 |
| rs76904798 | 12 | 0.132 | T | C | 1.16 |
| rs78738012 | 4 | 0.106 | C | T | 1.14 |
| rs8005172 | 14 | 0.424 | T | C | 1.08 |
| rs8118008 | 20 | 0.596 | A | G | 1.07 |
| rs823118 | 1 | 0.467 | C | T | 0.89 |
| rs9275326 | 6 | 0.114 | T | C | 0.85 |
| rs9468199 | 6 | 0.172 | A | G | 1.12 |
| Abbreviations: Chr, chromosome; PD, Parkinson's disease; SNP, single nucleotide polymorphisms; EAF, effect allele frequency; OR, odds ratio. | | | | | |
|

| **Table S3. Association between PD-PRS and incident PD** | | | |
| --- | --- | --- | --- |
|  | **Low PRS** | **Intermediate PRS** | **High PRS** |
| **HR (95% CI)** | 1.00 (Ref.) | 1.25 (1.13, 1.39) | 1.80 (1.60, 2.02) |
| Abbreviation: PD, Parkinson's disease; HR, hazard ratio; 95% CI, 95% confidence interval; PRS, polygenic risk score. | | | |
| Adjusted for first 10 principal components of ancestry, and genotype measurement batch. | | | |

| **Table S4. Stratified analysis for the association between time spent in outdoor light (summer) and incidence of Parkinson's disease** | | | | | |
| --- | --- | --- | --- | --- | --- |
|  | **N** | **< 2 h/day** | **2 to 3 h/day** | **> 3 h/day** | **P interaction** |
| **BMI** |  |  |  |  | 0.947 |
| < 25 | 125840 | 1.00 (Ref.) | 0.85 (0.67, 1.07) | 0.72 (0.57, 0.92) |  |
| ≥ 25 | 249759 | 1.00 (Ref.) | 0.93 (0.79, 1.09) | 0.79 (0.67, 0.92) |  |
| **Sex** |  |  |  |  | 0.041 |
| female | 201911 | 1.00 (Ref.) | 0.87 (0.72, 1.06) | 0.67 (0.55, 0.82) |  |
| male | 173688 | 1.00 (Ref.) | 0.94 (0.79, 1.13) | 0.86 (0.72, 1.03) |  |
| **Age** |  |  |  |  | 0.008 |
| < 60 | 206140 | 1.00 (Ref.) | 1.01 (0.79, 1.28) | 1.02 (0.80, 1.31) |  |
| ≥ 60 | 169459 | 1.00 (Ref.) | 0.86 (0.74, 1.01) | 0.71 (0.61, 0.83) |  |
| **Occupation** |  |  |  |  | 0.108 |
| retired | 128642 | 1.00 (Ref.) | 0.83 (0.68, 1.01) | 0.67 (0.55, 1.81) |  |
| others | 245388 | 1.00 (Ref.) | 0.95 (0.80, 1.13) | 0.87 (0.73, 1.04) |  |
| Adjusted for age, sex, education, Townsend deprivation index, smoking status, alcohol consumption, body mass index, occupation, dietary pattern, vitamin D supplementation, use of sun/UV protection, PM2.5, baseline hypertension, dyslipidaemia, cancer, cardiovascular disease, PRS, first 10 principal components of ancestry, and genotype measurement batch. | | | | | |

| **Table S5. Stratified analysis for the association between time spent in outdoor light (winter) and incidence of Parkinson’s disease** | | | | | |
| --- | --- | --- | --- | --- | --- |
|  | ***N*** | **< 1 h/day** | **1 to 2 h/day** | **> 2 h/day** | ***P* interaction** |
| **BMI** |  |  |  |  | 0.148 |
| < 25 | 125840 | 1.00 (Ref.) | 1.08 (0.87, 1.32) | 0.80 (0.62, 1.03) |  |
| ≥ 25 | 249759 | 1.00 (Ref.) | 0.96 (0.84, 1.09) | 0.86 (0.74, 0.99) |  |
| **Sex** |  |  |  |  | 0.021 |
| female | 201911 | 1.00 (Ref.) | 1.08 (0.92, 1.27) | 0.77 (0.62, 0.94) |  |
| male | 173688 | 1.00 (Ref.) | 0.93 (0.81, 1.08) | 0.87 (0.74, 1.02) |  |
| **Age** |  |  |  |  | 0.007 |
| < 60 | 206140 | 1.00 (Ref.) | 1.24 (0.99, 1.54) | 1.24 (0.95, 1.62) |  |
| ≥ 60 | 169459 | 1.00 (Ref.) | 0.93 (0.82, 1.05) | 0.78 (0.68, 0.90) |  |
| **Occupation** |  |  |  |  | 0.06 |
| retired | 65653 | 1.00 (Ref.) | 0.91 (0.78, 1.05) | 0.73 (0.62, 0.87) |  |
| others | 286671 | 1.00 (Ref.) | 1.08 (0.92, 1.26) | 1.02 (0.84, 1.23) |  |
| Adjusted for age, sex, education, Townsend deprivation index, smoking status, alcohol consumption, body mass index, occupation, dietary pattern, vitamin D supplementation, use of sun/UV protection, PM2.5, baseline hypertension, dyslipidaemia, cancer, cardiovascular disease, PRS, first 10 principal components of ancestry, and genotype measurement batch. | | | | | |

| **Table S6. Stratified analysis for the association between time spent in outdoor light (average) and incidence of Parkinson’s disease** | | | | | |
| --- | --- | --- | --- | --- | --- |
|  | ***N*** | **< 1.5 h/day** | **1.5-2.5 h/day** | **> 2.5 h/day** | ***P* interaction** |
| **BMI** |  |  |  |  | 0.434 |
| < 25 | 125840 | 1.00 (Ref.) | 1.04 (0.84, 1.28) | 0.80 (0.64, 0.99) |  |
| ≥ 25 | 249759 | 1.00 (Ref.) | 0.96 (0.84, 1.10) | 0.83 (0.72, 0.95) |  |
| **Sex** |  |  |  |  | 0.132 |
| female | 201911 | 1.00 (Ref.) | 0.95 (0.80, 1.13) | 0.74 (0.62, 0.89) |  |
| male | 173688 | 1.00 (Ref.) | 1.02 (0.87, 1.20) | 0.89 (0.76, 1.05) |  |
| **Age** |  |  |  |  | 0.009 |
| < 60 | 206140 | 1.00 (Ref.) | 1.12 (0.90, 1.40) | 1.09 (0.87, 1.37) |  |
| ≥ 60 | 169459 | 1.00 (Ref.) | 0.93 (0.81, 1.07) | 0.77 (0.67, 0.88) |  |
| **Occupation** |  |  |  |  | 0.033 |
| retired | 65653 | 1.00 (Ref.) | 0.92 (0.77, 1.09) | 0.72 (0.61, 0.85) |  |
| others | 286671 | 1.00 (Ref.) | 1.02 (0.87, 1.12) | 0.95 (0.81, 1.12) |  |
| Adjusted for age, sex, education, Townsend deprivation index, smoking status, alcohol consumption, body mass index, occupation, dietary pattern, vitamin D supplementation, use of sun/UV protection, PM2.5, baseline hypertension, dyslipidaemia, cancer, cardiovascular disease, PRS, first 10 principal components of ancestry, and genotype measurement batch. | | | | | |

| **Table S7 Sensitive analysis for the association between time spent in outdoor light and incidence of Parkinson's disease, additionally adjusted for physical activities, vitamin D, and sleep patterns** | | | |
| --- | --- | --- | --- |
| **Time spent in outdoor light** | **Event/Total** | **HR (95% CI)** | ***P* Value** |
| **Summer** |  |  |  |
| <2 h/day | 298 / 48668 | 1.00 (Ref.) |  |
| 2 to 3 h/day | 1012 / 146765 | 0.93 (0.81, 1.06) | 0.251 |
| >3 h/day | 1514 / 180166 | 0.81 (0.71, 0.93) | 0.002 |
| **Winter** |  |  |  |
| <1 h/day | 417 / 71832 | 1.00 (Ref.) |  |
| 1 to 2 h/day | 1660 / 218953 | 1.02 (0.92, 1.14) | 0.705 |
| >2 h/day | 747 / 84814 | 0.91 (0.80, 1.03) | 0.152 |
| **Average** |  |  |  |
| <1.5 h/day | 403 / 70375 | 1.00 (Ref.) |  |
| 1.5 to 2.5 h/day | 1022/ 141577 | 1.01 (0.90, 1.13) | 0.911 |
| >2.5 h/day | 1399 / 163647 | 0.87 (0.77, 0.98) | 0.024 |
| Adjusted for age, sex, education, Townsend deprivation index, smoking status, alcohol consumption, body mass index, occupation, dietary pattern, vitamin D supplementation, use of sun/UV protection, PM2.5, baseline hypertension, dyslipidaemia, cancer, cardiovascular disease, PRS, first 10 principal components of ancestry, genotype measurement batch, physical activities, vitamin D, and sleep patterns. | | | |

| **Table S8. Sensitive analysis for the association between time spent in outdoor light and incidence of Parkinson's disease** | | | | |
| --- | --- | --- | --- | --- |
| **Time spent in outdoor light** | **exclude within 2 years** | | **Fine-Gray Model** | |
| **HR (95% CI)** | ***P* Value** | **HR (95% CI)** | ***P* Value** |
| **Summer** |  |  |  |  |
| <2 h/day | 1.00 (Ref.) |  | 1.00 (Ref.) |  |
| 2 to 3 h/day | 0.91 (0.80, 1.04) | 0.161 | 0.91 (0.79, 1.03) | 0.145 |
| >3 h/day | 0.78 (0.68, 0.89) | <0.001 | 0.77 (0.68, 0.88) | <0.001 |
| **Winter** |  |  |  |  |
| <1 h/day | 1.00 (Ref.) |  | 1.00 (Ref.) |  |
| 1 to 2 h/day | 1.01 (0.90, 1.13) | 0.879 | 0.99 (0.89, 1.11) | 0.906 |
| >2 h/day | 0.86 (0.76, 0.98) | 0.021 | 0.85 (0.75, 0.96) | 0.011 |
| **Average** |  |  |  |  |
| <1.5 h/day | 1.00 (Ref.) |  | 1.00 (Ref.) |  |
| 1.5 to 2.5 h/day | 1.00 (0.99, 1.12) | 0.984 | 0.98 (0.88, 1.11) | 0.80 |
| >2.5 h/day | 0.84 (0.74, 0.94) | 0.003 | 0.83 (0.73, 0.93) | 0.002 |
| Abbreviation: HR, hazard ratio; 95% CI, 95% confidence interval.  Adjusted for age, sex, education, Townsend deprivation index, smoking status, alcohol consumption, body mass index, occupation, dietary pattern, vitamin D supplementation, use of sun/UV protection, PM2.5, baseline hypertension, dyslipidaemia, cancer, cardiovascular disease, PRS, first 10 principal components of ancestry, and genotype measurement batch. | | | | |


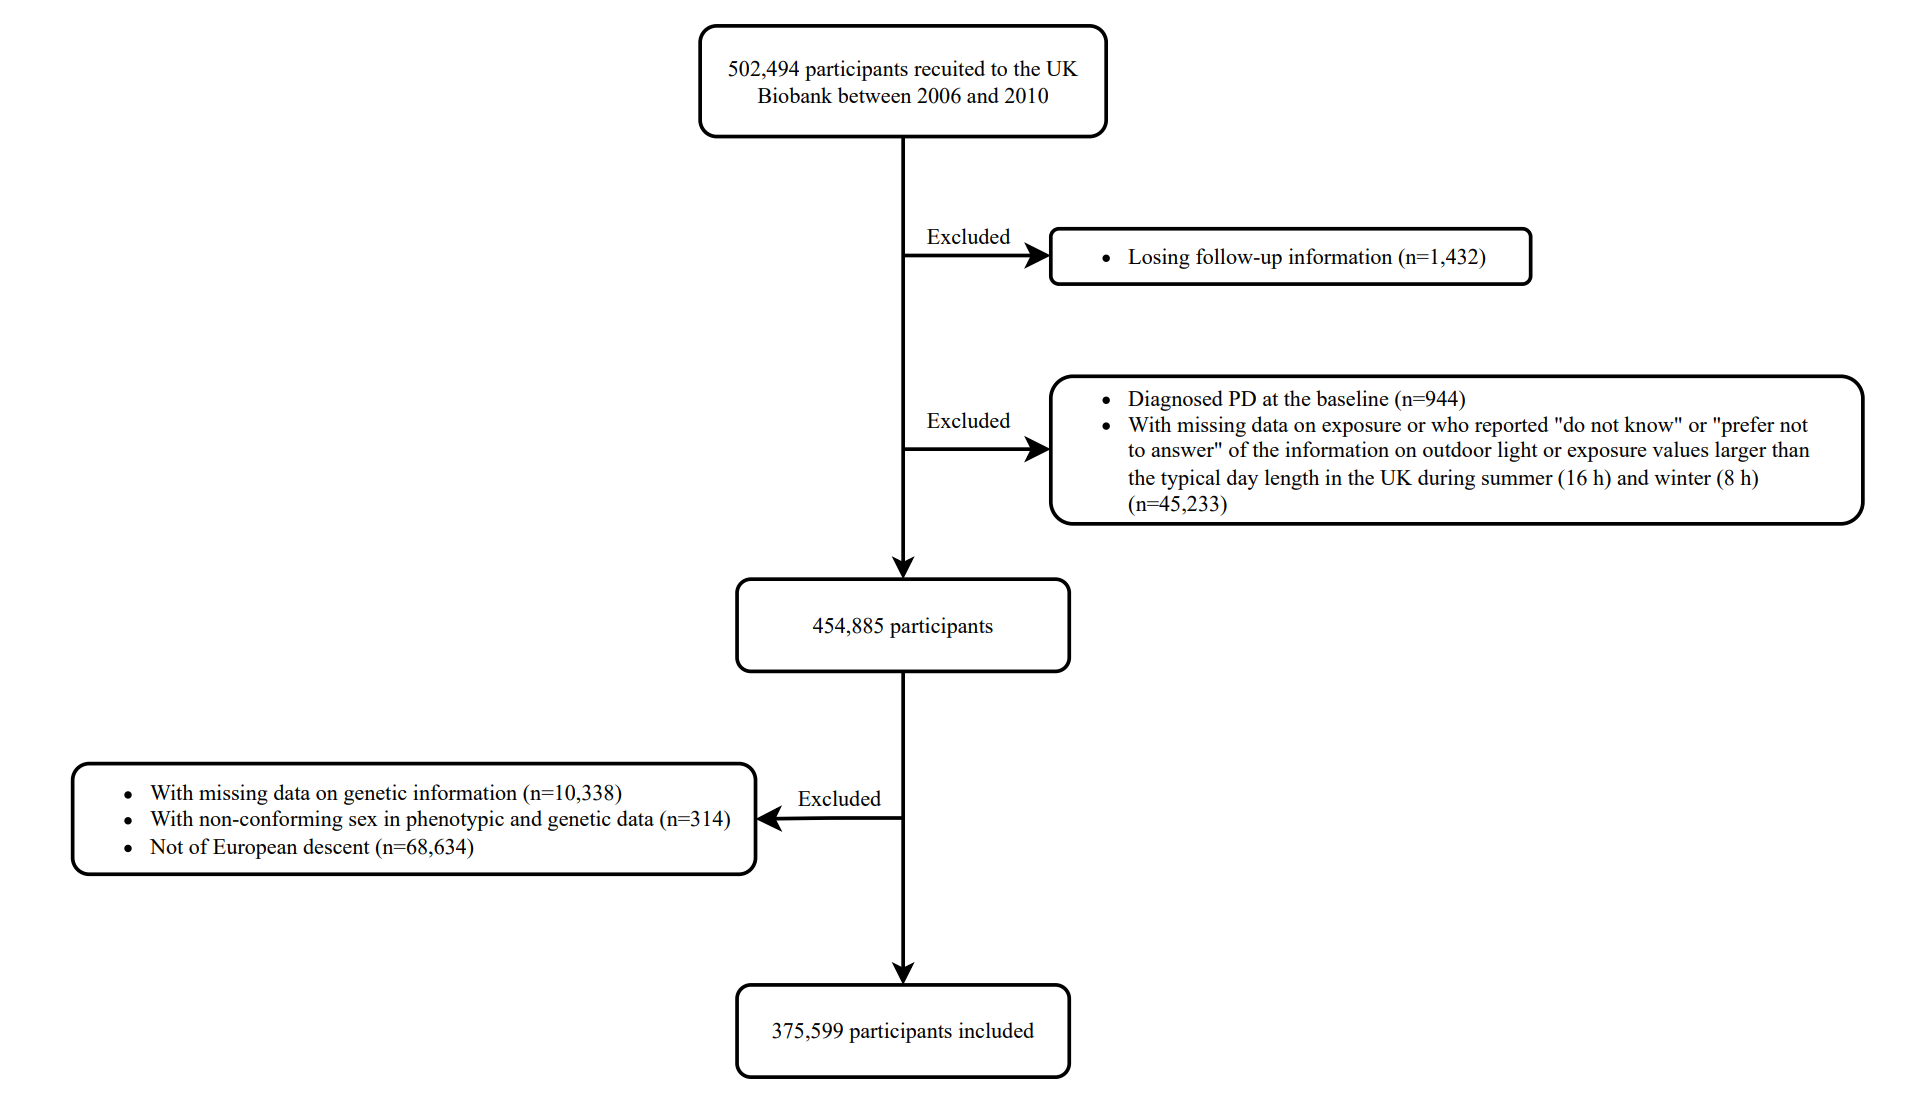


**Fig S1.** Flow of participants in current study


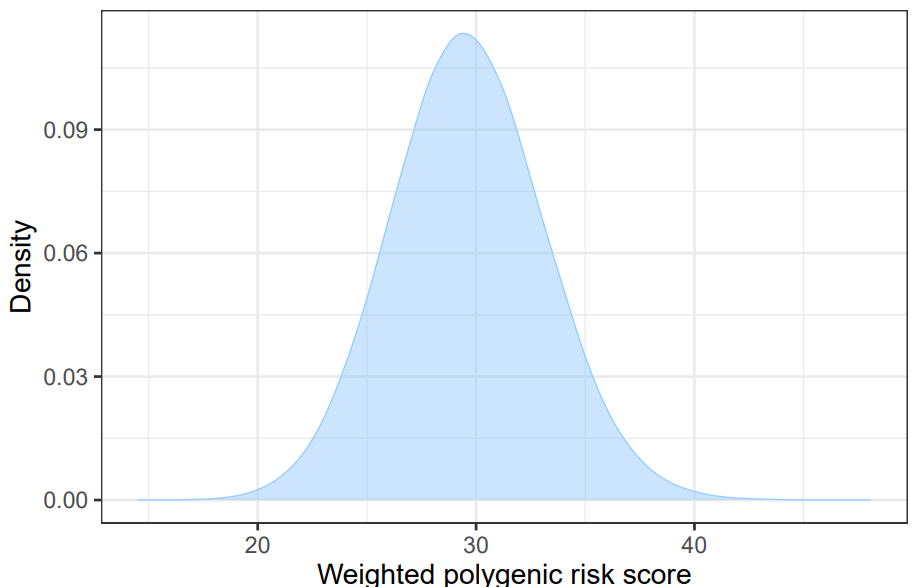


**Fig S2.** The Curve of Density Distribution and Weighted Polygenic Risk Score


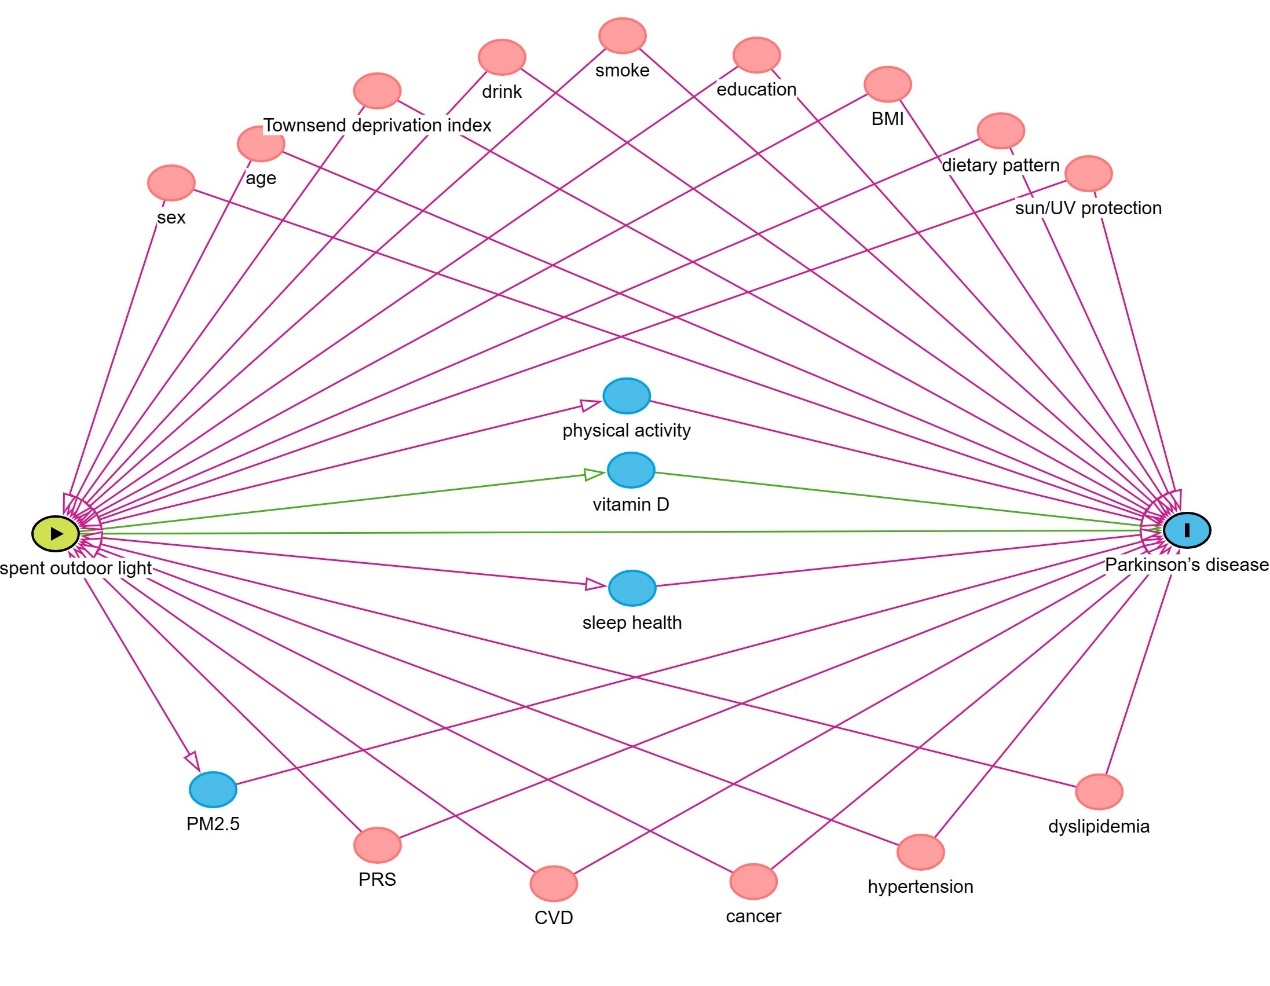


**Fig S3.** Directed acyclic graph (DAG) explaining the association between the exposures, the outcome, and covariates included in the analyses.

Sociodemographic characteristics (age, sex, ethnicity, education, and occupation), socioeconomic status (Townsend Deprivation Index), lifestyle factors (physical activity, sleep pattern, smoking, alcohol consumption, and usual diet), comorbidities (hypertension, dyslipidaemia, cardiovascular disease, and cancer) at the time of recruitment, vitamin D supplementation, and outdoor environmental-related variables (use of sun/UV protection and PM2.5) which may act as confounders or mediators or both in the association between time spent outdoor light and PD risk.

DAG was drawn using http://www.dagitty.


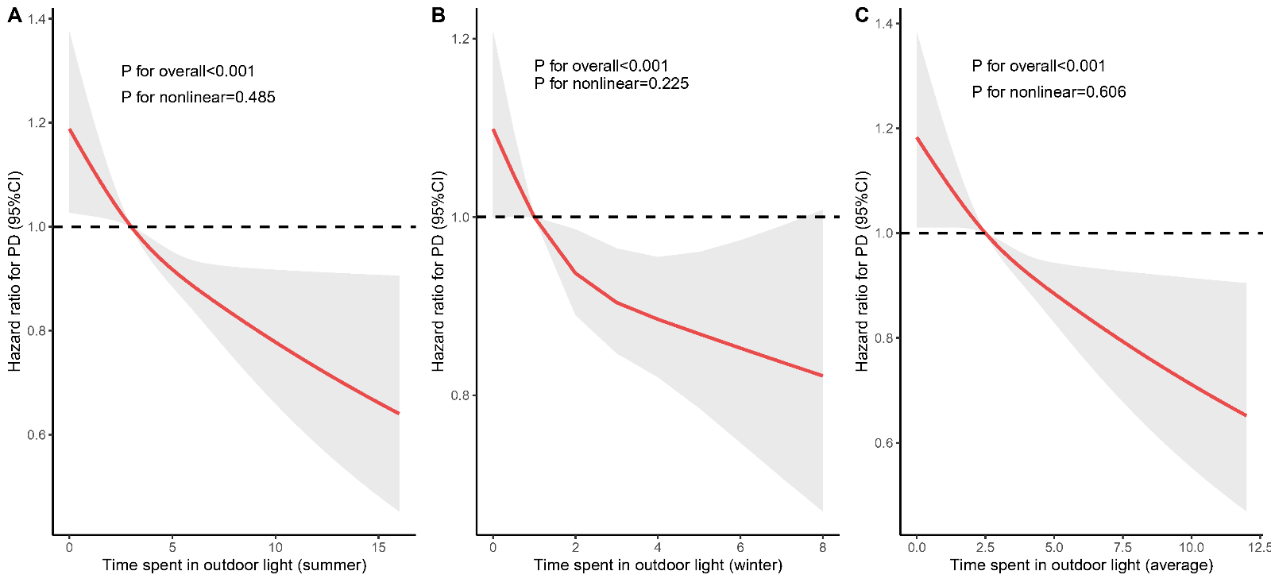


**Fig S4.** Associations of time spent in outdoor light time in summer (A), in winter (B), and on average (C) with the risk of Parkinson’s disease.

Adjusted for age, sex, education, Townsend deprivation index, smoking status, alcohol consumption, body mass index, occupation, dietary pattern, vitamin D supplementation, use of sun/UV protection, PM2.5, baseline hypertension, dyslipidaemia, cancer, cardiovascular disease, PRS, first 10 principal components of ancestry, and genotype measurement batch.
